# Supplementary material
Source: PubMed Central journal article supplement (PMC6741521)
Supplement: jin-0006-0632-s01.pdf [file jin-0006-0632-s01.pdf]

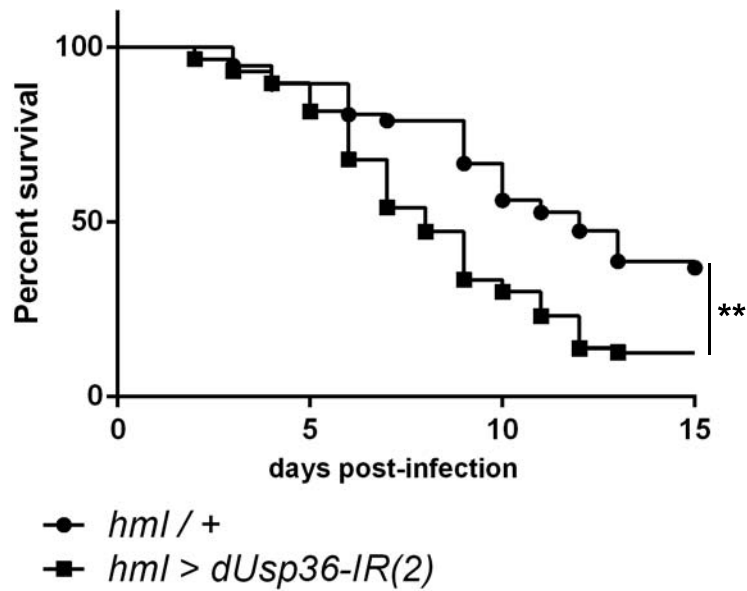

Supplemental figure 1

**Online Suppl. Fig. 1. *dUsp36* inactivation in hemocytes sensitizes flies to *L. monocytogenes* infections.** Flies were injected with 100 CFUs of wild-type *L. monocytogenes* and monitored for survival. *dUsp36* hemocyte-specific inactivation was carried out using a second dsRNA transgene targeting a different sequence in *dUsp36* [25]. Significance was determined by log-rank analysis of the survival curves (\*\*  $p < 0.001$ ).
